# Supplementary material
Source: publisher figshare collection journal article supplement (https://gsajournals.figshare.com/articles/dataset/_/6305780)
Supplement: Supplementary file 1 [file 1]

**Table S1. Cuticle collagen genes are transcriptional targets of the DBL-1 pathway**

| **Gene** | **L2 Stage** | | |
| --- | --- | --- | --- |
| ***dbl-1***  **Microarray**  **Fold Change** | ***dbl-1***  **qRT-PCR**  **Fold Change** | ***sma-3***  **qRT-PCR**  **Fold Change** |
| *rol-6* | -2.15 | -1.3 | ND |
| *col-41* | -2.64 | -1.2 | -1.4 |
| *col-141* | 3.19 | 1.6 | 1.7 |
| *col-142* | 2.65 | ND | 1.5 |

Microarray results are reproduced from ([Liang et al.](#_ENREF_26) 2007). qRT-PCR experiments were performed with 2-4 biologically independent samples for each genotype. Results shown are from a representative concurrent trial. ND: Not determined.
